# Supplementary material for: Effect of UV-Absorbing Nets on the Performance of the Aphid Predator Sphaerophoria rueppellii (Diptera: Syrphidae)
Source: MDPI journal article supplement (doi:10.3390/insects11030166), 2020-03-05
Supplement: s1 [file s1]

**Table S1.** Percentage of UV radiation transmitted under each type of net (mean  $\pm$  SE). Different letters between Standard net and Photosensitive net refer to significant differences (student t-test,  $P < 0.05$ ).

| Experiment                 | Standard net      | Photosensitive net |
|----------------------------|-------------------|--------------------|
| Field experiment           | 48.93 $\pm$ 1.30a | 20.39 $\pm$ 0.88b  |
| Fitness-related parameters | 99.46 $\pm$ 7.56a | 61.63 $\pm$ 5.01b  |
| Foraging behaviour         | 87.04 $\pm$ 6.01a | 49.29 $\pm$ 4.43b  |
